# Supplementary material for: Honey bee survival is affected by interactions between field-relevant rates of fungicides and insecticides used in apple and blueberry production
Source: Atypon-hosted journal article supplement (doi:10.1139/facets-2017-0025), 2017-01-01
Supplement: facets-2017-0025_supplement1.csv [file facets-2017-0025_supplement1.csv]

Experiment	Compound	Alive	Dead
Part_01	Control	9	3
Part_01	Control	10	3
Part_01	Control	8	2
Part_01	Acetamiprid	8	3
Part_01	Acetamiprid	7	5
Part_01	Acetamiprid	10	1
Part_01	Acetamiprid	9	1
Part_01	Acetamiprid	8	1
Part_01	Propiconazole	12	1
Part_01	Propiconazole	9	1
Part_01	Propiconazole	6	3
Part_01	Propiconazole	8	3
Part_01	Propiconazole	8	2
Part_01	Boscalid_Pyraclostrobin	9	2
Part_01	Boscalid_Pyraclostrobin	9	1
Part_01	Boscalid_Pyraclostrobin	9	1
Part_01	Boscalid_Pyraclostrobin	6	4
Part_01	Boscalid_Pyraclostrobin	6	4
Part_01	Acetamiprid_Propiconazole	0	12
Part_01	Acetamiprid_Propiconazole	0	10
Part_01	Acetamiprid_Propiconazole	0	11
Part_01	Acetamiprid_Propiconazole	0	9
Part_01	Acetamiprid_Propiconazole	0	10
Part_01	Acetamiprid_Boscalid_Pyraclostrobin	9	1
Part_01	Acetamiprid_Boscalid_Pyraclostrobin	8	2
Part_01	Acetamiprid_Boscalid_Pyraclostrobin	9	1
Part_01	Acetamiprid_Boscalid_Pyraclostrobin	6	4
Part_01	Acetamiprid_Boscalid_Pyraclostrobin	12	3
Part_02	Control	9	1
Part_02	Control	10	0
Part_02	Control	10	0
Part_02	Control	10	0
Part_02	Spinetotram	8	2
Part_02	Spinetotram	10	0
Part_02	Spinetotram	10	0
Part_02	Spinetotram	9	1
Part_02	Propiconazole	8	2
Part_02	Propiconazole	9	1
Part_02	Propiconazole	10	0
Part_02	Propiconazole	10	0
Part_02	Spinetotram_Propiconazole	10	0
Part_02	Spinetotram_Propiconazole	9	1
Part_02	Spinetotram_Propiconazole	4	6
Part_02	Spinetotram_Propiconazole	7	3
Part_02	Boscalid_Pyraclostrobin	10	0
Part_02	Boscalid_Pyraclostrobin	10	0
Part_02	Boscalid_Pyraclostrobin	10	0
Part_02	Boscalid_Pyraclostrobin	6	4
Part_02	Spinetotram_Boscalid_Pyraclostrobin	9	1
Part_02	Spinetotram_Boscalid_Pyraclostrobin	10	0
Part_02	Spinetotram_Boscalid_Pyraclostrobin	8	2
Part_02	Spinetotram_Boscalid_Pyraclostrobin	10	0
Part_03	Control	10	0
Part_03	Control	10	0
Part_03	Control	9	1
Part_03	Control	9	1
Part_03	Control	6	4
Part_03	Acetamiprid	3	7
Part_03	Acetamiprid	6	4
Part_03	Acetamiprid	10	1
Part_03	Acetamiprid	9	1
Part_03	Acetamiprid	9	1
Part_03	Acetamiprid_Flusilazole	7	4
Part_03	Acetamiprid_Flusilazole	8	2
Part_03	Acetamiprid_Flusilazole	8	2
Part_03	Acetamiprid_Flusilazole	9	1
Part_03	Acetamiprid_Flusilazole	6	4
Part_03	Spinetoram	5	6
Part_03	Spinetoram	9	1
Part_03	Spinetoram	11	0
Part_03	Spinetoram	12	0
Part_03	Spinetoram	9	1
Part_03	Spinetoram_Flusilazole	0	11
Part_03	Spinetoram_Flusilazole	4	7
Part_03	Spinetoram_Flusilazole	0	11
Part_03	Spinetoram_Flusilazole	2	8
Part_03	Spinetoram_Flusilazole	7	4
Part_03	Flusilazole	10	0
Part_03	Flusilazole	11	0
Part_03	Flusilazole	10	0
Part_03	Flusilazole	7	3
Part_03	Flusilazole	7	3
